# Supplementary material
Source: publisher figshare collection journal article supplement (https://geolsoc.figshare.com/ndownloader/files/11472197)
Supplement: Supplementary file 1 [file 11472197]

## Sheet: Sheet1
Quadrat	GPS	sampling approach	dropstone									fossils
			peblle #	cell	x	y	pebble size (cm)		roundness			shell #	cell	x	y	shell size (cm)	shell type	articulation	fragmentation	preservation	orientation	attachment
WH1	35° 19′ 17″ S 150°27′ E	field collection	1	11	7	9	1*1		round			1	11	5	3	2*1	spiriferids	no	complete	concave up	160	no
			2	15	45	4	5.5*4.5		subround			2	16	52	2	2*1	spiriferids	no	complete	mould	？	no
			3	26	53	17	2*1.5		angle			3	16	57	3	2*1	spiriferids	no	complete	?	？	no
			4	32	15	23	1*1		round			4	25	47	17	5*2	spiriferids	no	complete	mould concave up	45	no
			5	41	3	37	4*4		subangle			5	26	57	15	2.5*2.5	Echinalosia	?	complete	concave down	80	no
			6	42	19	31	1.5*1		round			6	34	35	20	1.5*1	spiriferids	no	complete	？	？	no
			7	46	53	37	1.5*1		angle			7	35	41	24	1.5*1	brachs mould	?	?	？	？	no
			8	54	36	42	1*1		subangle			8	35	46	25	1.5*1	brachs mould	no	?	？	？	no
			9	63	22	58	3*2.5		subround			9	35	42	28	2.5*1.5	brachs mould	no	?	？	？	no
			10	65	44	53	4.5*2		angle			10	35	45	29	1.5*1	?		?	？	？	no
												11	36	52	23	1.5*1.5	Echinalosia	no	complete	？	？	no
												12	36	55	24	1.5*1	spiriferids	?	?	？	？	no
												13	45	42	33	1.5*1	?	?	?	？	？	no
												14	45	46	33	1.5*1	?	?	?	？	？	no
												15	45	44	35	1.5*1	?	?	?	？	？	no
												16	45	47	34	1.5*1	?	?	?	？	？	no
												17	55	45	43	3.5*1.5	spiriferids	?	?	？	？	no
												18	56	55	47	2*1.5	coral		complete	？	？	no
WH2	35° 19′ 17″ S 150°27′ E	field collection	peblle #	cell	x	y	pebble size (cm)		roundbess			shell #	cell	x	y	shell size (cm)	shell type	articulation	fragmentation	preservation
			1	14	31	3	1*1		round			1	14	33	3	2.5*1	mould	no	complete	lateral
			2	15	47	9	2.5*2		round			2	15	48	5	4*2	?	yes	complete	lateral
			3	25	47	26	1.5*1.5		subround			3	25	44	13	2*1	mould	no	complete	?
			4	26	50	16.5	1.5*1		subangle			4	26	56	12	1.5*1	mould	no	complete	?
			5	33	23	29	1.5*1		angle			5	26	52	16	2*1.5	mould	yes	complete	?
			6	43	27	31	1*1		angle			6	32	19	27	2.5*1	mould	no	complete	?
			7	45	43	39	1*1		subangle			7	32	18	30	2*1	mould	no	complete	?
			8	45	47	35	1*1		angle			8	33	23	27	2*1.5	mould	yes	complete	?
			9	46	52	38	2.5*1.5		subround			9	35	45	21	1.5*1.5	mould	yes	complete	?
			10	52	19	48	1*1		round			10	35	44	23	2.5*2	mould	yes	complete	?
												11	44	32	32	2.5*1	mould	no	complete	?
												12	45	47	38	2*1.5	mould	?	complete	concave up
												13	55	48	46	3*2	mould	no	complete	?
												14	62	14	56	2*1	mould	no	complete	?
												15	66	51	50	1.5*1.5	mould	no	complete	?
Wh3	35° 19′ 17″ S 150°27′ E	field collection	peblle #	cell	x	y	pebble size (cm)		roundbess			shell #	cell	x	y	shell size (cm)	shell type	articulation	fragmentation
			1	12	14	8	4.5*1		angle			1	14	31.5	9	2*1.5	mould	no	complete
			2	13	22	5	2*2		angle			2	23	26	12	5*3.5	spiriferids shell	?	complete
			3	13	25.5	1	1.5*1.5		angle			3	23	27	14	3.5*1.5	shell	?	complete
			4	14	32.5	2	1.51		subangle			4	24	37	16	4*1	mould	yes	complete
			5	15	43	9	2*1.5		angle			5	24	39	12	2*1	mould	no	complete
			6	15	46	9	3*2		subangle			6	25	42	16	2.5*1	mould	yes	complete
			7	22	17	13	4*2		angle			7	34	38	20	3.5*2	mould	yes	complete
			8	22	20	13	2*1.5		angle			8	35	41	20	2.5*1	mould	no	complete
			9	23	30	20	2.5*2		subround			9	35	47	27	4.5*1.5	mould	?	complete
			10	25	44	14	4.5*2		angle			10	45	48	31	2.5*1	mould	no	complete
			11	25	45	20	4.5*4		subangle			11	55	45	49	2*1.5	mould	no	complete
			12	36	57	21	2.5*1.5		angle			12	56	52	48	2.5*1	mould	no	complete
			13	45	49	34	3*2		round
			14	55	48	46	4.5*3		subround
WH4	35° 19′ 17″ S 150°27′ E	field collection	peblle #	cell	x	y	pebble size (cm)		roundbess			shell #	cell	x	y	shell size (cm)	shell type	articulation	fragmentation
			1	11	0	0	9*5		angle			1	11	3	6	2*1.5	mould	?	complete
			2	11	5	9	1.5*1		subangle			2	22	10	13	1.5*1	mould	no	complete
			3	33	27	29	1*1		subround			3	23	24	13	2*1	mould	no	complete
			4	36	52	28	1*1		subround			4	33	28	22	2.5*1	mould	?	complete
			5	42	15	36	1*1		angle			5	36	55	27	4*2	mould	no	complete
			6	46	52	35	1*1		subround			6	42	15	35	2.5*1.5	mould	yes	complete
			7	46	54	36	1*1		subround			7	45	45	33	3*1	mould	no	complete
			8	52	14	42	1*1		round			8	45	47	32	2*1.5	mould	no	complete
			9	54	33	49	3*2		round			9	46	56	41	3*3	mould	no	complete
			10	65	41	58	1.5*1		subangle			10	51	5	44	6*2	mould	yes	complete
												11	55	48	48	2*2	mould	no	？
												12	56	52	44	2.5*2	mould	？	complete
												13	56	54	42	1.5*1	mould	no	？
												14	65	44	58	2*1	mould	no	complete
												15	66	54	56	2.5*1.5	mould	no	？
			peblle #	cell	x	y	pebble size (cm)		roundbess			shell #	cell	x	y	shell size (cm)	shell type	articulation	fragmentation
WH5	35° 19′ 17″ S 150°27′ E	image collection	1	32	18	27	7*3.5		round			1	11	9	8	2.5*1	mould	no	complete
			2	33	28	24	4*3		subround			2	13	23	6	4*1	mould	?	complete
			3	34	34	23	8*3.5		angle			3	13	29	4	3*1	mould	no	complete
			4	42	17	35	1*1		round			4	24	35	19	2*1.5	shell	no	fragment
			5	61	3	51	4*2.5		round			5	24	37	18	3.5*2	shell	no	fragment
												6	26	52	18	1.5*1.5	mould	no	complete
												7	32	13	23	4*3.5	shell	no	fragment
												8	32	15	24	3*2.5	shell	no	fragment
												9	33	25	23	2.5*1.5	shell	no	fragment
			peblle #	cell	x	y	pebble size (cm)		roundbess			shell #	cell	x	y	shell size (cm)	shell type	articulation	fragmentation
Wh6	35° 19′ 17″ S 150°27′ E	image collection	1	26	51	11	3.5*2		round			1	13	22	10	2.5*2.5	mould	?	complete
			2	34	33	30	6.5*3.5		round			2	22	17	17	2*1.5	mould	no	complete
			3	43	30	33	4*2.5		round			3	33	30	24	2*2	mould	?	complete
			4	62	15	54	4*2.5		angle			4	33	25	27	1.5*1.5	mould	no	complete
			5	66	53	54	5*3.5					5	33	27	28	2*1.5	mould	?	?
												6	34	34	24	4.5*1	mould	no	complete
												7	35	41	28	2*1.5	？	?	?
												8	42	16	33	2.5*2	produ	?	?
												9	42	18	35	1.5*1.5	produ	?	?
												10	43	24	37	4.5*3	？	?	complete
												11	43	29	28	2.5*2	？	?	?
												12	55	44	42	1.5*1	？	?	?
												13	63	24	51.5	2.5*2	？	?	?
			peblle #	cell	x	y	pebble size (cm)		roundbess			shell #	cell	x	y	shell size (cm)	shell type	articulation	fragmentation
WH7	35° 19′ 17″ S 150°27′ E	image collection	1	15	47	8	1*1		round			1	16	57	6	2*1	mould	?	?
			2	22	17	14.5	3*1		round			2	23	17	22	2.5*1.5	？	?	?
			3	23	21	17	2*1.5		round			3	26	56	18	2.5*1	？	?	?
			4	23	26	14	3*1.5		subround			4	31	9	25	3*1.5	mould	no	?
			5	24	34	18	3*2		subround			5	32	18	23	2*1	？	?	?
			6	31	5	27.5	1*1		round			6	34	35	24	4*3	mould	no	complete
			7	31	9	29	3*2		round			7	35	49	21	3*1	mould	no	complete
			8	34	34	21	1*1		angle			8	36	52	22	2.5*1	mould	no	?
			9	54	36	47	3.5*3		angle			9	36	58	25	2.5*1	mould	?	?
			10	54	36	49	3*2		round			10	36	52	29	2*1	mould	?	?
			11	55	49	48	3.5*3		round			11	43	29	30	3*2	shell	no	fragment
			12	61	8	52	2.5*2.5		subangle			12	43	21	35	2.5*1.5	shell	no	fragment
			13	64	36	53	3.5*2		angle			13	45	45	38	2.5*1	mould	no	?
												14	45	47	37	3.5*1.5	mould	?	?
												15	45	49	39	2.5*2	shell	no	fragment
												16	51	3	43	2*1	mould	?	?
												17	51	5	46	3*2	mould	no	?
												18	52	19	43	2*2	shell	?	?
												19	52	15	49	1.5*1.5	shell	no	fragment
												20	53	28	46	2.5*1	mould	?	?
												21	53	28	49	2*1	mould	?	?
												22	54	37	44	3*2.5	mould	no	complete
												23	55	43	44	2.5*2	mould	?	?
												24	64	34	54	2.5*1	mould	?	?
												25	66	54	53	4*2.5	mould	?	?
			peblle #	cell	x	y	pebble size (cm)		roundbess			shell #	cell	x	y	shell size (cm)	shell type	articulation	fragmentation
WH8	35° 21′ 45″ S 150°29′ 22″ E	image collection	1	13	29	8	5.5*3.5		subround			1	12	16	9	4*2.5	coral	?	complete
			2	21	10	11.5	4*2		round			2	13	20	8	5.5*3	coral	?	complete
			3	22	12	10	4*3		angle			3	22	11	16	5*2.5	coral	?	complete
			4	24	38	12	5.5*3		round			4	22	14	16	3.5*2.5	brachs	?	fragment
			5	21	8	16	3*2.5		angle			5	22	16	13	4*2.5	brachs	?	fragment
			6	21	10	19	1*1		round			6	22	20	18	5*4	brachs	no	complete
			7	32	11	22	1*1		round			7	23	23	17	5*3.5	brachs	no	complete
			8	32	15	20	4.5*4		subangle			8	23	27	18	4*3	brachs	no	complete
			9	33	28	27	1.5*1		round			9	24	30	16	3.5*3	brachs	no	complete
			10	51	9	44	1*1		round			10	24	32	18	3*2.5	brachs	no	complete
			11	53	22	42	1*1		round			11	25	47	12	2.5*2	brachs	no	complete
			12	64	31	59	3*2		round			12	31	4	21	2*2	brachs	no	complete
			13	66	53	57	6*4.5		round			13	32	16	26	2.5*2	brachs	no	fragment
												14	32	18	23	3*2	brachs	no	fragment
												15	33	22	22	3.5*2.5	brachs	no	complete
												16	33	22	27	2.5*2.5	brachs	no	complete
												17	33	26	23	4*3	brachs	no	complete
												18	41	7	30	3*1.5	coral	?	complete
												19	42	15	32	7*3	coral	?	complete
												20	66	52	50	5.5*4.5	brachs	no	complete
												21	66	58	57	2.5*1.5	brachs	no	fragment
			peblle #	cell	x	y	pebble size (cm)		roundbess			shell #	cell	x	y	shell size (cm)	shell type	articulation	fragmentation
WH9	35° 21′ 45″ S 150°29′ 22″ E	image collection	1	11	3	5	3.5*1.5		subround			1	11	3	3	2.5*1	mould	no	complete
			2	11	9	4	2.5*1.5		subround			2	12	19	7	2*1	mould	no	?
			3	21	6	10	1.5*1.5		subround			3	12	20	9	1.5*1.5	mould	no	?
			4	33	27	25	1*1		round			4	22	14	13	3*2.5	mould	?	complete
			5	33	27	29	1.5*1		round			5	23	23	16	2.5*2	mould	?	?
			6	34	37	28	2.5*1		angle			6	23	27	17	2.5*1.5	mould	?	?
												7	24	37	15	3*3	mould	?	complete
												8	31	8	25	3*2	mould	?	?
												9	33	23	25	2.5*2	mould	?	?
												10	34	32	22	2.5*2	mould	?	?
												11	41	7	32	2.5*1	mould	?	?
												12	43	24	36	2*1.5	？	?	?
												13	51	3	40	5*2.5	mould	?	?
												14	51	8	44	5.5*5	mould	yes	complete
												15	62	15	57	2.5*1	mould	?	?
SI1	35° 11′ 13″ S 150°35′ 34″ E	field collection	peblle #	cell	x	y	pebble size (cm)	type	roundness	Orientation		shell #	cell	x	y	shell size (cm)	shell type	articulation	fragmentation	preservation	orientation	attachment
			1	21	2	18	3*1	granite	angle	12		1	23	21	18	2.5*2.5	Ingelaroiidea	disarticulation	complete	concave up	93	no
			2	22	12	17	3*1	granite	subangle	107		2	23	30	27	2.5*2.5	?	disarticulation	complete	concave down	175	no
			3	23	22	15	3*2	quartzite	subangle	91		3	25	46	12	1.5*1	?	disarticulation	fragment	concave up	?	No
			4	23	24	16	1*1	granite	subround	80		4	32	12	24	2.5*1.5	?	disarticulation	fragment	concave down	260	No
			5	23	27	18	1*1	quartzite	sunround	20		5	35	44	25	2.5*2.5	?	disarticulation	complete	concave down	280	No
			6	24	32	18	3.5*2	granite	subangle	5		6	36	55	27	3*4.5	?	disarticulation	complete	concave down	146	No
			7	25	47	12	1*1	quartzite	subround	?		7	42	13	34	3.5*3.5	Ingelaroiidea	disarticulation	complete	concave up	80	No
			8	31	6	27	3*2.5	quartzite	angle	80		8	42	17	35	2.5*2.5	Ingelaroiidea	disarticulation	complete	concave up	90	No
			9	32	13	25	1.5*1.5	quartzite	round	?		9	44	35	38	1.5*1.5	?	disarticulation	fragment	?	?	No
			10	32	14	24	1.5*1.5	quartzite	round	?		10	46	55	33	1.5*2	?	disarticulation	fragment	?	170	No
			11	34	34	23	3.5*2.5	quartzite	subround	61		11	51	9	42	5*2	coral	?	?	?	22	No
			12	41	4	30	1*1	granite	round	?		12	53	27	41	1.5*1.5	Ingelaroiidea	?	?	?	170	No
			13	42	17	39	1*1	quartzite	round	?		13	54	36	44	2.5*1	coral	?	?	?	190	No
			14	44	36	36	1*1	?	round	?		14	56	52	46	2*1	coral	?	?	?	167	No
			15	45	42	37	3*2.5	granite	subround	?
			16	45	50	38	3.5*1.5	?	angle	37
			17	46	51	37	1*1.5	?	subround	?
			18	52	13	42	2*1	granite	subangle	154
			19	53	23	50	3.5*2.5	granite	subround	?
			20	53	29	41	1.5*1.5	quartzite	round	?
			21	54	35	47	1*1	quartzite	round	?
			22	55	47	45	3*1.5	quartzite	angle	73
			23	62	16	58	1*1.5		round	?
Note: the main focus of the data collection is the point coordinates in each quadrats for spatial distribution analysis. the orientation, type and preservation are not always complete in the original data as some are unrecoginzible in the field and image. ? Represents unrecognized in the field and from image.
